# Supplementary material for: AAV5-miHTT Gene Therapy Demonstrates Broad Distribution and Strong Human Mutant Huntingtin Lowering in a Huntington’s Disease Minipig Model
Source: PubMed Central journal article supplement — Mol Ther. 2018 Jun 25;26(9):2163–77. doi: 10.1016/j.ymthe.2018.06.021 (PMC6127509; doi:10.1016/j.ymthe.2018.06.021), 2018-06-25
Supplement: mmc1.pdf [file mmc1.pdf]

## **Supplemental Information**

### **AAV5-miHTT Gene Therapy Demonstrates Broad Distribution and Strong Human Mutant Huntingtin Lowering in a Huntington's Disease Minipig Model**

**Melvin M. Evers, Jana Miniarikova, Stefan Juhas, Astrid Vallès, Bozena Bohuslavova, Jana Juhasova, Helena Kupcova Skalnikova, Petr Vodicka, Ivona Valekova, Cynthia Brouwers, Bas Blits, Jacek Lubelski, Hana Kovarova, Zdenka Ellederova, Sander J. van Deventer, Harald Petry, Jan Motlik, and Pavlina Konstantinova**

## Supplementary Materials

**Table S1.** Overview of used tgHD minipigs

| Sex (M/F) | Number | Genotype | Date of birth | Date of sacrifice | Age       | treatment                        |
|-----------|--------|----------|---------------|-------------------|-----------|----------------------------------|
| M         | L 308  | TG       | 29.12.2012    | 27.6.2016         | 42 months | 1x10 <sup>13</sup> gc AAV5-GFP   |
| M         | L 309  | TG       | 29.12.2012    | 28.6.2016         | 42 months | 1x10 <sup>13</sup> gc AAV5-GFP   |
| M         | L 378  | TG       | 20.2.2013     | 28.6.2016         | 40 months | 3x10 <sup>13</sup> gc AAV5-miHTT |
| M         | L 457  | TG       | 26.5.2013     | 29.6.2016         | 37 months | 3x10 <sup>13</sup> gc AAV5-miHTT |
| M         | L 484  | TG       | 14.6.2013     | 29.6.2016         | 36 months | 3x10 <sup>13</sup> gc AAV5-miHTT |
| M         | L 491  | TG       | 7.6.2013      | 7.7.2016          | 37 months | 1x10 <sup>13</sup> gc AAV5-miHTT |
| M         | L 616  | TG       | 13.11.2013    | 7.7.2016          | 32 months | 1x10 <sup>13</sup> gc AAV5-miHTT |
| M         | N 71   | TG       | 23.4.2014     | 16.4.2016         | 24 months | 1x10 <sup>13</sup> gc AAV5-miHTT |
| F         | N 72   | TG       | 23.4.2014     | 27.6.2016         | 26 months | 1x10 <sup>13</sup> gc AAV5-GFP   |
| M         | N 173  | TG       | 13.8.2014     | 8.7.2016          | 23 months | Formulation buffer               |
| M         | N 175  | TG       | 13.8.2014     | 8.7.2016          | 23 months | Formulation buffer               |
| M         | N 176  | TG       | 13.8.2014     | 11.6.2016         | 22 months | Formulation buffer               |

Table S2. Hematology of individual tgHD minipigs

|               | Parameter    | Formulation buffer |       |      | 1×10 <sup>13</sup> gc AAV5-miHTT |      |      | 3×10 <sup>13</sup> gc AAV5-miHTT |       |      | metric              | Normal      |
|---------------|--------------|--------------------|-------|------|----------------------------------|------|------|----------------------------------|-------|------|---------------------|-------------|
| <b>DAY 0</b>  | <b>WBC</b>   | 10,04              | 7,69  | 9,1  | 7,35                             | 5,65 | 5,74 | 9,19                             | 10,27 | 7,04 | 10 <sup>3</sup> /μl | (7/22.0)    |
|               | <b>RBC</b>   | 5,44               | 6,57  | 5,23 | 6,64                             | 5,05 | 6,05 | 5,63                             | 5,7   | 5,4  | 10 <sup>6</sup> /μl | (5/8)       |
|               | <b>HGB</b>   | 11,9               | 13,6  | 11,6 | 13,4                             | 11,9 | 13,4 | 11,4                             | 12,4  | 10,9 | g/dl                | (9.0/16.0)  |
|               | <b>HCT</b>   | 33,8               | 39,2  | 33,5 | 39,2                             | 33,4 | 39,2 | 34,4                             | 35,3  | 31,3 | %                   | (26.0/50.0) |
|               | <b>MCV</b>   | 62                 | 59,7  | 64,1 | 59                               | 66,2 | 64,9 | 61,1                             | 62    | 57,9 | μm3                 | (42/68)     |
|               | <b>MCH</b>   | 21,9               | 20,7  | 22,3 | 20,2                             | 23,5 | 22,1 | 20,2                             | 21,8  | 20,1 | pg                  | (14/23)     |
|               | <b>MCHC</b>  | 35,2               | 34,7  | 34,7 | 34,2                             | 35,5 | 34,1 | 33                               | 35,1  | 34,7 | g/dl                | (30/36)     |
|               | <b>PLT</b>   | 393                | 449   | 423  | 381                              | 173  | 483  | 404                              | 337   | 324  | 10 <sup>3</sup> /μl | (100/720)   |
|               | <b>LYMPH</b> | 45,9               | 42,4  | 48,2 | 39,2                             | 40,4 | 55,5 | 39,3                             | 42,3  | 40,3 | %                   | 35,5-62     |
|               | <b>MONO</b>  | 4,1                | 5,1   | 4,1  | 5,5                              | 4,7  | 2,7  | 2,9                              | 5     | 2,2  | %                   | 1,6-8,8     |
|               | <b>EOS</b>   | 0,2                | 1,1   | 0,5  | 0,5                              | 4,1  | 0,3  | 0,2                              | 0,3   | 0,4  | %                   | 0,1-5,6     |
|               | <b>BASO</b>  | 0,9                | 0,9   | 0,4  | 0,6                              | 0,8  | 0,4  | 0,2                              | 0,6   | 0,2  | %                   | 0,-2,7      |
|               | <b>NEUT</b>  | 48,4               | 49,6  | 45,9 | 53,5                             | 48,9 | 40,9 | 56,4                             | 50,8  | 56,2 | %                   | 26,6-56,7   |
| <b>DAY 7</b>  | <b>WBC</b>   | 9,84               | 12,22 | 9,38 | 6,86                             | 7,36 |      | 7,62                             | 13,39 | 7,35 | 10 <sup>3</sup> /μl | (7/22.0)    |
|               | <b>RBC</b>   | 5,5                | 4,85  | 5,43 | 5,45                             | 5,74 |      | 5                                | 5,42  | 4,51 | 10 <sup>6</sup> /μl | (5/8)       |
|               | <b>HGB</b>   | 12,1               | 10    | 11,9 | 10,9                             | 14,1 |      | 10,5                             | 12    | 9,2  | g/dl                | (9.0/16.0)  |
|               | <b>HCT</b>   | 34,9               | 28,8  | 35,3 | 31,8                             | 38,5 |      | 30,9                             | 34,1  | 26,6 | %                   | (26.0/50.0) |
|               | <b>MCV</b>   | 63,4               | 59,5  | 64,9 | 58,4                             | 67   |      | 61,8                             | 62,8  | 59   | μm3                 | (42/68)     |
|               | <b>MCH</b>   | 21,9               | 20,6  | 22   | 20,1                             | 24,6 |      | 20,9                             | 22,2  | 20,5 | pg                  | (14/23)     |
|               | <b>MCHC</b>  | 34,6               | 34,6  | 33,9 | 34,4                             | 36,8 |      | 33,8                             | 35,3  | 34,7 | g/dl                | (30/36)     |
|               | <b>PLT</b>   | 482                | 570   | 371  | 530                              | 204  |      | 414                              | 459   | 461  | 10 <sup>3</sup> /μl | (100/720)   |
|               | <b>LYMPH</b> | 45,2               | 39,3  | 46,8 | 48                               | 28,6 |      | 35,4                             | 28,7  | 35,8 | %                   | 35,5-62     |
|               | <b>MONO</b>  | 3,3                | 4,2   | 3,6  | 5,9                              | 7,3  |      | 3,4                              | 4,7   | 2,7  | %                   | 1,6-8,8     |
|               | <b>EOS</b>   | 1,2                | 1,9   | 1,6  | 0,7                              | 0,27 |      | 0,3                              | 0,6   | 1,6  | %                   | 0,1-5,6     |
|               | <b>BASO</b>  | 1,1                | 0,3   | 0,6  | 0,5                              | 1,2  |      | 0,2                              | 0,6   | 0,2  | %                   | 0,-2,7      |
|               | <b>NEUT</b>  | 48,2               | 53,7  | 46,4 | 44,5                             | 58,3 |      | 59,6                             | 64,6  | 58,9 | %                   | 26,6-56,7   |
| <b>DAY 14</b> | <b>WBC</b>   | 8,87               | 8,43  | 8,99 | 7,93                             | 5,98 |      | 7,53                             | 16,59 | 6,08 | 10 <sup>3</sup> /μl | (7/22.0)    |
|               | <b>RBC</b>   | 5,53               | 6,76  | 5,51 | 6,19                             | 4,47 |      | 5,58                             | 5,48  | 4,44 | 10 <sup>6</sup> /μl | (5/8)       |
|               | <b>HGB</b>   | 11,8               | 13,9  | 12   | 12,3                             | 10,1 |      | 11,4                             | 12    | 8,9  | g/dl                | (9.0/16.0)  |
|               | <b>HCT</b>   | 35,1               | 41    | 35,6 | 37,4                             | 30   |      | 35,2                             | 34,8  | 26,1 | %                   | (26.0/50.0) |
|               | <b>MCV</b>   | 63,5               | 60,6  | 64,7 | 60,4                             | 67,1 |      | 63,2                             | 63,6  | 58,8 | μm3                 | (42/68)     |
|               | <b>MCH</b>   | 21,4               | 20,5  | 21,9 | 19,9                             | 22,7 |      | 20,5                             | 21,9  | 20,1 | pg                  | (14/23)     |
|               | <b>MCHC</b>  | 33,7               | 33,9  | 33,8 | 32,9                             | 33,9 |      | 32,5                             | 34,4  | 34,1 | g/dl                | (30/36)     |
|               | <b>PLT</b>   | 430                | 577   | 309  | 557                              | 524  |      | 366                              | 509   | 487  | 10 <sup>3</sup> /μl | (100/720)   |
|               | <b>LYMPH</b> | 37,4               | 53,4  | 52,7 | 48,3                             | 48,5 |      | 44,5                             | 28,3  | 44,5 | %                   | 35,5-62     |
|               | <b>MONO</b>  | 5,6                | 5,2   | 4,2  | 3,8                              | 6    |      | 2,4                              | 6,2   | 2,4  | %                   | 1,6-8,8     |
|               | <b>EOS</b>   | 0,4                | 1,1   | 0,5  | 1,1                              | 2,4  |      | 0,4                              | 0,1   | 0,3  | %                   | 0,1-5,6     |
|               | <b>BASO</b>  | 1,4                | 1,1   | 0,7  | 0,6                              | 1    |      | 0,5                              | 0,8   | 0,2  | %                   | 0,-2,7      |
|               | <b>NEUT</b>  | 54,5               | 38,6  | 41   | 46                               | 41   |      | 51,4                             | 63,7  | 51,8 | %                   | 26,6-56,7   |
| <b>DAY 28</b> | <b>WBC</b>   | 9,3                | 7,66  | 9,62 | 8,91                             | 7,02 |      | 9,23                             | 16,06 | 6,32 | 10 <sup>3</sup> /μl | (7/22.0)    |
|               | <b>RBC</b>   | 5,56               | 7,38  | 4,76 | 5,96                             | 5,03 |      | 5,68                             | 5,4   | 5,85 | 10 <sup>6</sup> /μl | (5/8)       |
|               | <b>HGB</b>   | 11,8               | 14,7  | 10,3 | 11,7                             | 11,6 |      | 11,5                             | 11,8  | 11,4 | g/dl                | (9.0/16.0)  |
|               | <b>HCT</b>   | 35,2               | 45,7  | 30,2 | 35,4                             | 33,4 |      | 35,6                             | 33,8  | 34,8 | %                   | (26.0/50.0) |
|               | <b>MCV</b>   | 63,3               | 61,9  | 63,5 | 59,3                             | 66,4 |      | 62,7                             | 62,6  | 59,5 | μm3                 | (42/68)     |
|               | <b>MCH</b>   | 21,2               | 19,9  | 21,6 | 19,7                             | 23,1 |      | 20,2                             | 21,9  | 19,5 | pg                  | (14/23)     |
|               | <b>MCHC</b>  | 33,5               | 32,1  | 34   | 33,2                             | 34,8 |      | 32,1                             | 35    | 32,8 | g/dl                | (30/36)     |
|               | <b>PLT</b>   | 436                | 405   | 464  | 483                              | 444  |      | 163                              | 433   | 282  | 10 <sup>3</sup> /μl | (100/720)   |
|               | <b>LYMPH</b> | 54,7               | 61,3  | 54   | 41                               | 49,3 |      | 32,7                             | 33    | 45,6 | %                   | 35,5-62     |
|               | <b>MONO</b>  | 3,6                | 4     | 3,8  | 4,1                              | 5,7  |      | 3,6                              | 5,4   | 2,2  | %                   | 1,6-8,8     |
|               | <b>EOS</b>   | 0,4                | 1,1   | 0,8  | 0,6                              | 0,6  |      | 1                                | 0,3   | 0,3  | %                   | 0,1-5,6     |
|               | <b>BASO</b>  | 0,8                | 1,2   | 0,6  | 0,6                              | 0,9  |      | 0,5                              | 1     | 0,1  | %                   | 0,-2,7      |
|               | <b>NEUT</b>  | 39,9               | 32,1  | 40,3 | 53,3                             | 42,2 |      | 61,6                             | 59,5  | 51   | %                   | 26,6-56,7   |
| <b>DAY 56</b> | <b>WBC</b>   | 9,85               | 9,13  | 10,4 | 9,05                             | 6    |      | 8,97                             | 14,45 | 5,76 | 10 <sup>3</sup> /μl | (7/22.0)    |
|               | <b>RBC</b>   | 4,88               | 6,27  | 7,28 | 5,01                             | 4,78 |      | 5,14                             | 6,17  | 5,16 | 10 <sup>6</sup> /μl | (5/8)       |
|               | <b>HGB</b>   | 10,4               | 12,7  | 15,7 | 9,9                              | 10,8 |      | 10,5                             | 13    | 10,3 | g/dl                | (9.0/16.0)  |
|               | <b>HCT</b>   | 30,8               | 36,7  | 48,1 | 29,5                             | 31,3 |      | 32                               | 38,1  | 30,6 | %                   | (26.0/50.0) |
|               | <b>MCV</b>   | 63                 | 58,5  | 66,1 | 58,9                             | 65,5 |      | 62,3                             | 61,7  | 59,4 | μm3                 | (42/68)     |
|               | <b>MCH</b>   | 21,3               | 20,3  | 21,6 | 19,8                             | 22,5 |      | 20,4                             | 21    | 19,9 | pg                  | (14/23)     |
|               | <b>MCHC</b>  | 33,7               | 34,7  | 32,7 | 33,7                             | 34,4 |      | 32,8                             | 34    | 33,6 | g/dl                | (30/36)     |
|               | <b>PLT</b>   | 415                | 443   | 284  | 561                              | 27   |      | 327                              | 338   | 233  | 10 <sup>3</sup> /μl | (100/720)   |
|               | <b>LYMPH</b> | 48                 | 51,1  | 79,3 | 44,8                             | 59,1 |      | 45,2                             | 31,8  | 48,2 | %                   | 35,5-62     |
|               | <b>MONO</b>  | 3,2                | 3,9   | 2,1  | 3,9                              | 3,1  |      | 3                                | 3,5   | 3,8  | %                   | 1,6-8,8     |
|               | <b>EOS</b>   | 1,6                | 0,2   | 0,1  | 0,6                              | 2,4  |      | 1,1                              | 0,2   | 0,6  | %                   | 0,1-5,6     |
|               | <b>BASO</b>  | 0,5                | 0,4   | 1,1  | 0,4                              | 1,1  |      | 0,3                              | 0,5   | 0,3  | %                   | 0,-2,7      |
|               | <b>NEUT</b>  | 46,3               | 44,2  | 17,2 | 49,8                             | 32,7 |      | 49,8                             | 63,7  | 46,8 | %                   | 26,6-56,7   |

WBC, white blood cells; RBC, red blood cells; HGB, hemoglobin; HCT, hematocrit; MCV, mean corpuscular volume; MCH, mean corpuscular hemoglobin; MCHC, mean corpuscular hemoglobin

concentration; PLT, platelets; LYMPH, lymphocytes; MONO, monocytes; EOS, eosinophils; BASO, basophils; NEUT, neutrophils.

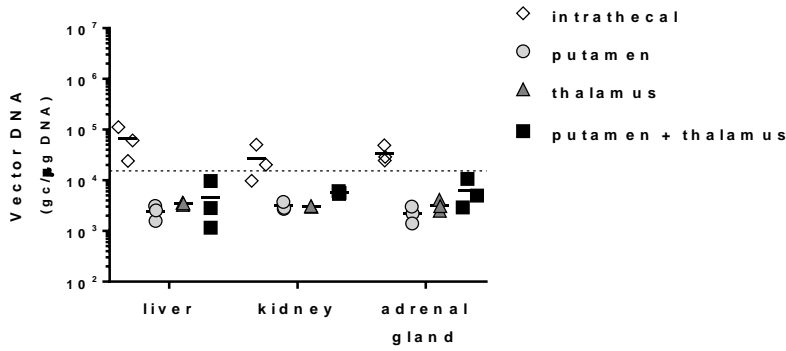

**Fig. S1.** AAV5-GFP vector DNA copies peripheral tissues after intrathecal and intracranial delivery. Tested organs: liver, kidney, and adrenal glands. Dotted lines represent the lower limit of quantification.

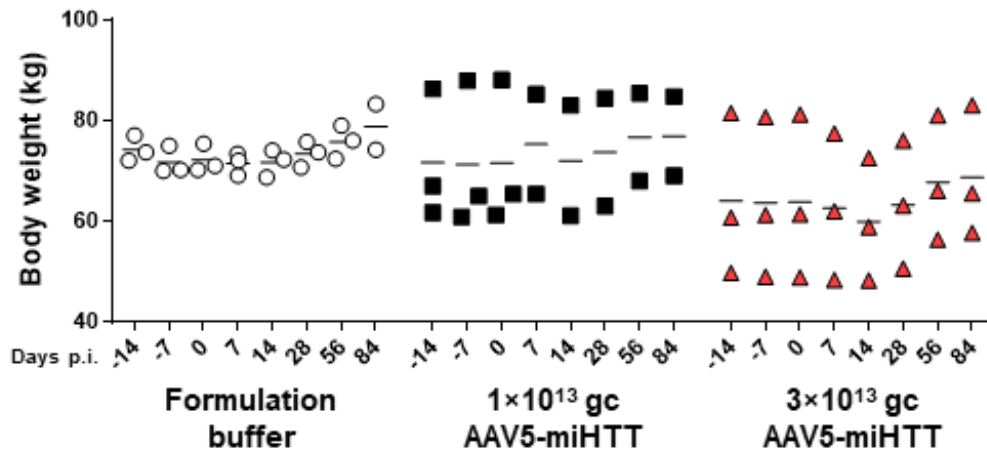

**Fig. S2.** Longitudinal body weight of tgHD minipigs.

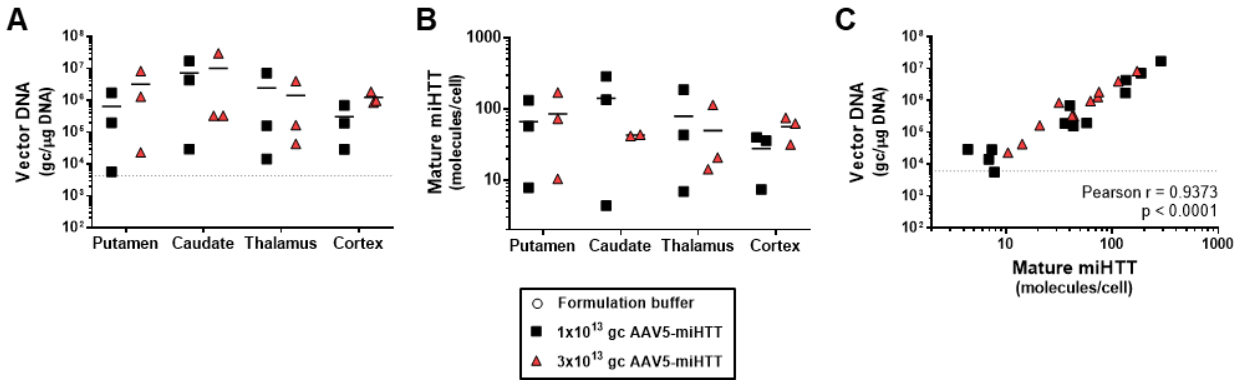

**Fig. S3.** AAV5-miHTT distribution and miHTT expression three months after putaminal and thalamic injection in healthy minipig brain: putamen, caudate nucleus, thalamus and cortex. One punch was taken per hemisphere per brain structure. **(A)** Vector DNA copies (gc/μg DNA) per brain punch. **(B)** Mature miHTT expression, values are represented as molecules per cell. **(C)** Correlation analysis graph plotting vector DNA and miHTT expression from matching brain region. Data from dissected regions from AAV5-miHTT treated animals were evaluated with non-linear regression log-log line with ordinary fit and Pearson correlation. Formulation buffer samples were excluded from the correlation and fit. Dotted lines represent lower limit of quantification.

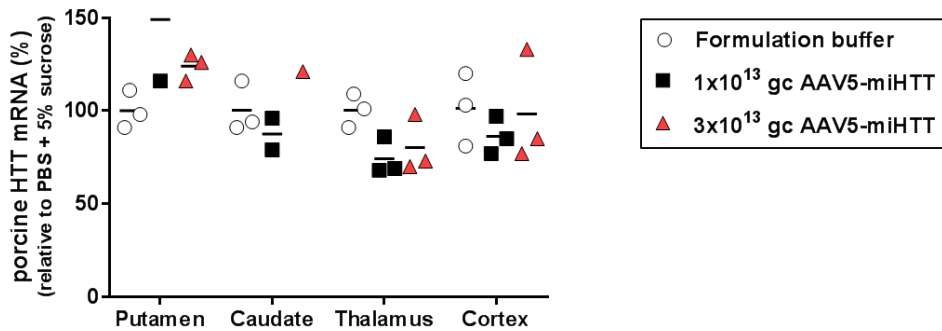

**Fig. S4.** Porcine HTT mRNA expression in the tgHD minipig brain: putamen, caudate nucleus, thalamus and cortex. Expression levels normalized to porcine GAPDH and relative to average of formulation buffer treated samples. No significant differences were found between the groups in any of the brain regions studied (one-way ANOVA).

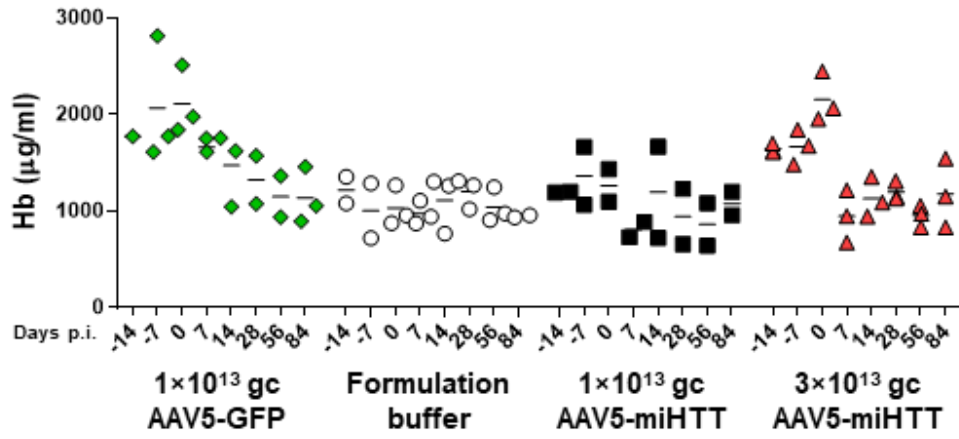

**Fig. S5.** ELISA of longitudinal hemoglobin (Hb) levels in tgHD minipig CSF samples.
